# Supplementary material for: [18F]NOS PET Brain Imaging Suggests Elevated Neuroinflammation in Idiopathic Parkinson’s Disease
Source: MDPI journal article supplement (doi:10.3390/cells11193081), 2022-09-30
Supplement: s1 [file s1]

**Supplementary Materials:**

| UPDRS vs 1TC WB VT  | Spearman's rho | <i>p</i> |
|---------------------|----------------|----------|
| Non-motor EDL       | 0.54           | 0.3      |
| Motor EDL           | -0.09          | 0.92     |
| Motor Examination   | 0.09           | 0.92     |
| Motor Complications | 0.41           | 0.43     |
| Total Score         | 0.54           | 0.3      |

Supplemental Table S1: Spearman's rank correlation of UPDRS scores with 1TC whole brain [<sup>18</sup>F]NOS V<sub>T</sub> did not reveal significance between radiotracer binding (V<sub>T</sub>) with Parkinson's disease severity measurements, total or subscores.
